# Supplementary material for: Crystal Structure of Human Myotubularin-Related Protein 1 Provides Insight into the Structural Basis of Substrate Specificity
Source: PubMed Central journal article supplement (PMC4809516; doi:10.1371/journal.pone.0152611), 2016-03-28

**S2 Figure.** Domain-swapped structure of MTMR6 (PDB code 2YF0). Each subunit was drawn in red or cyan.

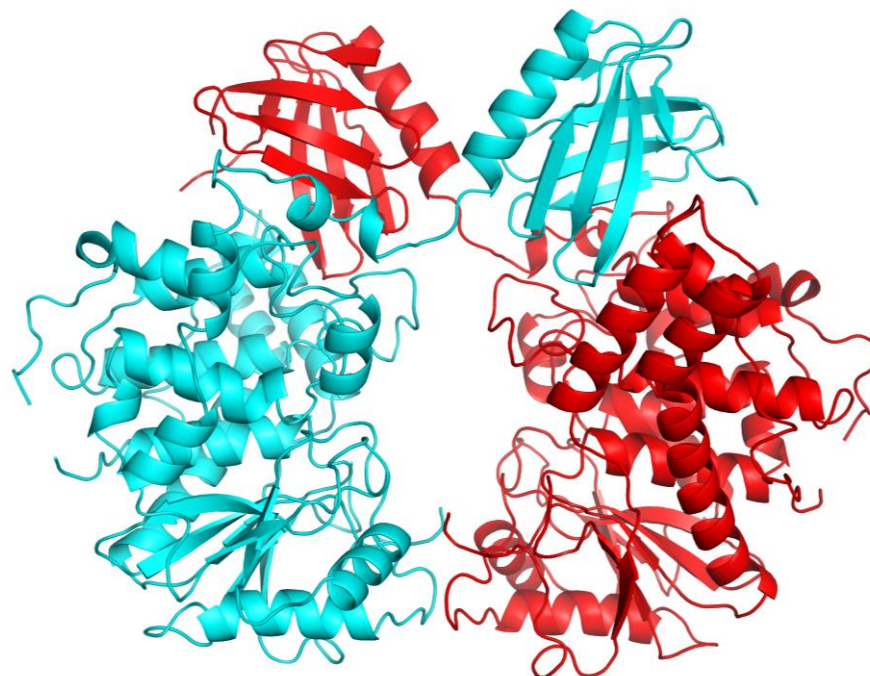

Supplement: pone.0152611.s002.pdf [file pone.0152611.s002.pdf]
