# Supplementary material for: Crystal Structure of Human Myotubularin-Related Protein 1 Provides Insight into the Structural Basis of Substrate Specificity
Source: PubMed Central journal article supplement (PMC4809516; doi:10.1371/journal.pone.0152611), 2016-03-28
Supplement: pone.0152611.s005.pdf [file pone.0152611.s005.pdf]

**S1 Table.** Interface residues involved in the PH-GRAM and PTP interactions in MTMR1.

| PH-GRAM              |                   |                  |                  |               | PTP          |      |        |       |             |
|----------------------|-------------------|------------------|------------------|---------------|--------------|------|--------|-------|-------------|
| Residue <sup>a</sup> | HSDC <sup>b</sup> | ASA <sup>c</sup> | BSA <sup>d</sup> | $\Delta^iG^e$ | Residue      | HSDC | ASA    | BSA   | $\Delta^iG$ |
| Phe101 (Thr)         |                   | 122.17           | 29.83            | 0.48          | Leu384 (Leu) |      | 38.54  | 17.73 | 0.28        |
| Tyr115 (Ser)         |                   | 22.78            | 3.66             | -0.04         | Leu387 (Leu) |      | 1.31   | 1.31  | 0.02        |
| Pro118 (Ser)         |                   | 118.28           | 59.43            | 0.95          | Lys388 (Leu) | H    | 136.53 | 98.90 | -0.92       |
| Phe119 (Leu)         |                   | 173.19           | 55.88            | 0.89          | Val391 (Asn) |      | 13.96  | 8.17  | 0.13        |
| Phe132 (Thr)         |                   | 86.29            | 52.71            | 0.84          | Tyr392 (Gly) | H    | 119.35 | 88.54 | 0.42        |
| Pro150 (Leu)         |                   | 40.48            | 14.23            | 0.23          | Pro393 (Thr) |      | 91.62  | 30.40 | 0.44        |
| Gly152 (His)         |                   | 54.90            | 38.82            | 0.48          | Ser394 (Lys) |      | 80.04  | 28.86 | 0.37        |
| Val153 (His)         |                   | 30.13            | 25.61            | 0.41          | Val485 (Cys) | H    | 31.64  | 17.13 | -0.08       |
| Ser155 (Ala)         |                   | 52.46            | 34.20            | -0.24         | Gly486 (Gly) |      | 11.98  | 6.00  | -0.02       |
| Arg156 (Ser)         |                   | 124.32           | 46.19            | -0.31         | His487 (Gln) |      | 37.08  | 3.33  | 0.38        |
| Val175 (Gln)         |                   | 45.75            | 6.68             | 0.11          | Gly488 (Leu) |      | 93.17  | 36.08 | 0.07        |
| Cys176 (Cys)         | H                 | 12.43            | 8.63             | -0.10         | Asn489 (Asp) |      | 87.72  | 10.72 | -0.05       |
| Lys177 (Lys)         | H                 | 138.45           | 103.07           | -1.03         | Asp490 (Gly) |      | 137.13 | 52.04 | 0.51        |
| Asp178 (Asn)         |                   | 60.86            | 57.73            | 0.24          | His492 (Pro) |      | 155.67 | 82.72 | 0.35        |
| Met179 (Phe)         |                   | 185.10           | 178.90           | 3.01          | Arg497 (-)   |      | 45.31  | 19.66 | -0.73       |
| Arg180 (Arg)         | H                 | 87.55            | 73.99            | -0.22         | Leu502 (Thr) |      | 3.62   | 1.84  | 0.03        |
| Asn181 (Thr)         | H                 | 85.44            | 46.99            | -0.31         | Asp531 (Glu) |      | 52.15  | 12.10 | -0.09       |
| Leu182 (Val)         |                   | 5.82             | 0.17             | 0.00          | His532 (His) |      | 33.86  | 1.88  | 0.03        |
| Asn201 (Leu)         |                   | 56.71            | 9.89             | -0.11         | Tyr534 (His) |      | 110.80 | 94.72 | 0.92        |
| Ala204 (Ser)         |                   | 15.39            | 8.62             | -0.09         | Ser535 (Ser) |      | 62.33  | 57.20 | 0.40        |
| Phe205 (Lys)         |                   | 133.14           | 64.52            | 0.96          | Cys536 (Cys) |      | 54.92  | 4.95  | 0.13        |
|                      |                   |                  |                  |               | Leu537 (Gln) |      | 119.21 | 52.71 | 0.84        |
|                      |                   |                  |                  |               | Tyr600 (Met) |      | 29.21  | 28.49 | 0.03        |
|                      |                   |                  |                  |               | Tyr601 (Tyr) |      | 21.89  | 20.54 | 0.04        |
|                      |                   |                  |                  |               | Arg603 (Gln) |      | 74.88  | 6.41  | -0.07       |
|                      |                   |                  |                  |               | Trp604 (Phe) |      | 180.98 | 90.25 | 0.90        |
|                      |                   |                  |                  |               | Asn605 (Asp) |      | 152.18 | 32.61 | -0.37       |

<sup>a</sup>Amino acids in the parentheses are corresponding residues in MTMR6. Strictly conserved residues are colored in red.

<sup>b</sup>HSDC, Residues making Hydrogen/Disulphide bond, Salt bridge or Covalent link.

<sup>c</sup>ASA, Accessible Surface Area ( $\text{\AA}^2$ ).

<sup>d</sup>BSA, Buried Surface Area ( $\text{\AA}^2$ ).

<sup>e</sup> $\Delta^iG$ , Solvation energy effect (kcal/mol).
